# Supplementary material for: Child growth and neurodevelopment after maternal antenatal antibiotic treatment
Source: HighWire-hosted journal article supplement (doi:10.1136/archdischild-2021-322043), 2021-09-03
Supplement: archdischild-2021-322043supp004_data_supplement.pdf [file archdischild-2021-322043supp004_data_supplement.pdf]

**Supplemental figure 3.** Cumulative incidence of stunting (HAZ < -2SD) and severe stunting (HAZ < -3SD) of boys and girls from one month to approximately 13 years of age by intervention group.

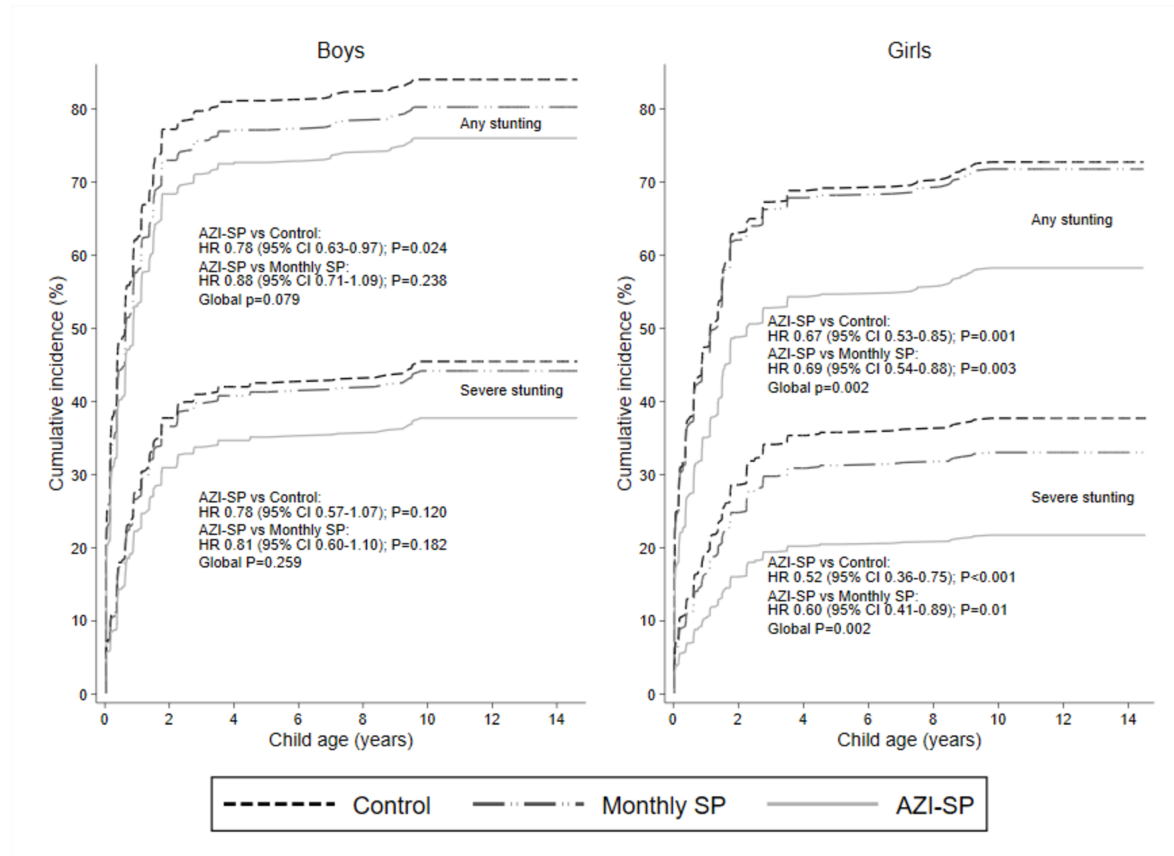

SP = sulfadoxine-pyrimethamine, AZI-SP = intervention group with monthly SP and two doses of azithromycin, HR = hazard ratio, CI = confidence interval.
